1 **An allele-specific functional SNP associated with two autoimmune diseases**  
2 **modulates *IRF5* expression by long-range chromatin loop formation**

3

4 Hlaing Nwe Thynn<sup>1#</sup>, Xiao-Feng Chen<sup>1#</sup>, Wei-Xin Hu<sup>1</sup>, Yuan-Yuan Duan<sup>1</sup>, Dong-Li Zhu<sup>1</sup>,  
5 Hao Chen<sup>1</sup>, Nai-Ning Wang<sup>1</sup>, Huan-Huan Chen<sup>1</sup>, Yu Rong<sup>1</sup>, Bing-Jie Lu<sup>1</sup>, Man Yang<sup>1</sup>, Feng  
6 Jiang<sup>1</sup>, Shan-Shan Dong<sup>1</sup>, Yan Guo<sup>1\*</sup>, Tie-Lin Yang<sup>1\*</sup>

7

8 <sup>1</sup> Key Laboratory of Biomedical Information Engineering of Ministry of Education, School of  
9 Life Science and Technology, Xi'an Jiaotong University, Xi'an, Shaanxi 710049, P. R. China.

10

11 <sup>#</sup> These authors contributed equally to this study.

12

13 **\*Corresponding authors:** Tie-Lin Yang, Ph.D. Yan Guo, Ph.D.

14 Key Laboratory of Biomedical Information Engineering of Ministry of Education, School of  
15 Life Science and Technology, Xi'an Jiaotong University, Shaanxi, Xi'an 710049, P. R. China

16 **PHONE:** 86-29-82668463

17 **E-MAIL:** yangtielin@mail.xjtu.edu.cn, guoyan253@mail.xjtu.edu.cn

18

19 **Abstract**

20 Both Systemic Lupus Erythematosus (SLE) and Systemic Sclerosis (SSc) are autoimmune  
21 diseases sharing similar genetic backgrounds. Genome-wide association studies (GWASs)  
22 have constantly disclosed numerous genetic variants conferring to both disease risks at  
23 7q32.1, but the functional mechanisms underlying them are still largely unknown. Through  
24 combining fine-mapping and functional epigenomic analyses, we prioritized a potential  
25 independent functional SNP (rs13239597) within *TNPO3* promoter region, residing in a  
26 putative enhancer element. Functional analysis integrating expression quantitative trait locus  
27 (eQTL) and high-throughput chromatin interaction (Hi-C) demonstrated that *IRF5* is the  
28 distal target gene (~118kb) of rs13239597, which is a key regulator of pathogenic  
29 autoantibody dysregulation increased risk of both SLE and SSc. We experimentally validated  
30 the long-range chromatin interactions between rs13239597 and *IRF5* using chromosome  
31 conformation capture (3C) assay. We further demonstrated that rs13239597-A acted as an  
32 allele-specific enhancer regulating *IRF5* expression, independently of *TNPO3* by using dual-  
33 luciferase reporter assays and CRISPR-Cas9. Particularly, the transcription factor EVI1 could  
34 preferentially bind to rs13239597-A allele and increase the enhancer activity to regulate *IRF5*  
35 expression. Taken together, our results uncovered the mechanistic insight connecting between  
36 a noncoding functional variant with a distal immunologically pathogenic gene *IRF5*, which  
37 might obligate in understanding the complex genetic architectures of SLE and SSc  
38 pathogenesis.

39

40 **Key words:** Systemic lupus erythematosus, systemic sclerosis, rs13239597, *IRF5*, *TNPO3*,  
41 long-range, chromatin loop, EVI1.

42

43

44

## 45 **Introduction**

46 Systemic Lupus Erythematosus (SLE [MIM: 152700]) and Systemic Sclerosis (SSc [MIM:  
47 181750]) are two typical systemic autoimmune diseases, which share pathogenic features  
48 such as interferon signature, loss of tolerance against self-nuclear antigens, multi-tissue  
49 damage and platelet system activation [1]. The worldwide prevalence is about 32 for SLE and  
50 24 for SSc per 100,000 [2]. Although the etiology of SLE and SSc remains unclear, genetic  
51 factors are considered as the key query point. Genome-wide association studies (GWASs)  
52 have identified a large number of risk genes associated with SLE and SSc, some of which are  
53 pleiotropic genes for both diseases such as *STAT4* (MIM: 600558) [3, 4], indicating that these  
54 two diseases share a portion of the genetic backgrounds.

55

56 Chromosome 7q32.1 locus harboring *IRF5-TNPO3* (*IRF5* [MIM: 607218], *TNPO3* [MIM:  
57 610032]) has been reported repeatedly as a strong association signal with SSc or SLE outside  
58 the human leukocyte antigen (*HLA*) region [5, 6]. This *IRF5-TNPO3* region also contains  
59 some susceptibility variants associated with other auto immune disorders, like rheumatoid  
60 arthritis, Sjogren's syndrome and multiple sclerosis [7]. A pan-meta GWAS study combining  
61 both SLE and SSc samples found the highest association signal for the SNP rs13239597 ( $P =$   
62  $1.17 \times 10^{-29}$ ) [8]. This SNP is located in the promoter region of *TNPO3* (Transportin 3) and  
63 ~118 kb downstream of *IRF5* (Interferon regulatory factor 5). *IRF5* is a well-known  
64 immunologic gene with crucial regulatory roles in modulating immune responses across  
65 numerous immune-related cell types in Toll-like receptor (TLR) signaling pathway [9].  
66 However, the functional roles of *TNPO3* in autoimmune etiology are largely unknown.  
67 Recent studies have found that SNPs within the potential regulatory elements could regulate  
68 expression of distal genes by long-range interactions [10, 11]. It is important and interesting

69 to decipher the functional roles of these autoimmune disease-associated SNPs and find out  
70 whether *TNPO3* or *IRF5* is the true target gene regulated by these variants, which might help  
71 fulfill the gap between GWAS findings and autoimmune disease etiology.

72

73 Therefore, in this study, we firstly prioritized a potential functional independent variant  
74 (rs13239597) located in an enhancer element at 7q32.1 through combining genomic fine-  
75 mapping and functional epigenomic analyses. Then, we optimized *IRF5* as the distal target  
76 gene for rs13239597 by integrating expression quantitative trait locus (eQTL) and high-  
77 throughput chromatin interaction (Hi-C) analysis. Such long-range chromatin interactions  
78 was also validated by using chromosome conformation capture (3C) assay. We further  
79 demonstrated that rs13239597 could act as an allele-specific strong enhancer to regulate *IRF5*  
80 expression through a series of functional assays including dual-luciferase reporter assays and  
81 CRISPR-Cas9. Finally, we found that transcription factor EVI1 (MIM: 165215) could  
82 preferentially bind to rs13239597-A allele to increase the enhancer activity on *IRF5*  
83 expression. Our findings uncovered a novel functional mechanisms connecting SNPs at  
84 *TNPO3* locus with *IRF5* in a long-range chromatin regulatory manner, which would provide  
85 promising routes towards the improved multidisciplinary therapy of complex autoimmune  
86 diseases.

87

## 88 **Materials and Methods**

### 89 **Conditional association and Bayesian fine-mapping analysis**

90 Genome-wide association analysis results on SLE at 7q32.1 locus were downloaded from a  
91 recent large-scale meta-analysis comprised 23,210 European samples [12]. Linkage  
92 disequilibrium (LD) analyses were conducted using Haploview Version 4.2 [13] in European  
93 samples from the 1000 genome V3 genotype data [14]. To identify potential independent

94 SLE-associated SNP(s), we performed a stepwise conditional association analysis using  
95 GCTA-COJO (--cojo-slct) [15, 16] analysis with LD correlations between SNPs estimated  
96 from 8748 unrelated samples from the Atherosclerosis Risk in Communities (ARIC) data  
97 (dbGap: phs000280.v3.p1.c1) [17]. To clarify the independent SLE association signal  
98 surrounding *TNPO3* locus, we further performed association analysis of *TNPO3* locus SNPs  
99 by conditioning on identified independent SNPs in *IRF5* locus. To prioritize potential causal  
100 SNPs surrounding *TNPO3* locus, we performed Bayesian fine-mapping analysis to identify  
101 95% credible SNP set, which was originally described by Maller *et al.* [18]

102

### 103 **Functional epigenetic annotation**

104 To prioritize potential functional variants, we annotated several enhancer related epigenetic  
105 markers for the regions surrounding our interest SNPs using ChIP-seq data from ENCODE  
106 [19], including the DNase I hypersensitivity (DHS), the histone markers (H3K27ac,  
107 H3K4me3), RNA polymerase II (Pol 2) and histone acetyltransferase p300 binding sites in  
108 immune related blood cell lines such as GM12878 lymphoblastoid cell line, primary T cells  
109 and primary B cells respectively. All annotated data were visualized by using WashU  
110 Epigenome Browser (v46.1).

111

### 112 **Cis-eQTL analysis**

113 Matched SNP genotype and RNA-seq data for 373 unrelated human lymphoblastoid cell lines  
114 (LCLs) samples of European population were retrieved from 1000 genome V3 genotype data  
115 [14] and ArrayExpress (E-GEUV-1) [20] respectively. We transformed genotype data into  
116 plink format using vcftools. By using the linear regression model implemented in PLINK,  
117 cis-eQTL analysis was conducted between selected SNPs and expression of nearby genes  
118 within 1 Mb region. For further validation, cis-eQTL association from publicly available

119 Genotype-Tissue Expression (GTEx) database, encompassing over 25,000 samples from 714  
120 donors across 53 tissues was also checked [21] with corresponding genotype data obtained  
121 from dbGaP (phs000424.v7.p2). We next queried for cis-eQTL in another peripheral blood  
122 samples from 5,311 individuals [22].

123

#### 124 **Hi-C and TAD analysis**

125 To validate the long-range regulation between focused SNP and its eQTL target gene, we  
126 checked their chromatin interactions using Hi-C or capture Hi-C data on GM12878 and  
127 CD34 cells downloaded from the previous studies [23, 24]. Hi-C data in IMR90 cells were  
128 obtained from 4D Genome databases [25, 26]. The original ChIA-PET data and newly  
129 improved ChIA-PET data on six cell lines (K562, NB4, HCT-116, HeLa-S3, GM12878, and  
130 MCF7) were acquired from the UCSC ENCODE download portal [27]. BEDTools [28] was  
131 used to extract the chromatic interacted regions. We further checked whether the focused  
132 SNP and its target gene are within the same topologically associating domain (TAD) region  
133 using TAD data in IMR90 cells collected from GEO database (GSE35156) [29].

134

#### 135 **Motif analysis**

136 We conducted motif analysis surrounding rs13239597 (50-bp) using MEME Suite toolkit [30]  
137 with three publicly available TF motif databases, namely JASPAR [31], HOCOMOCO [32],  
138 and SwissRegulon [33]. The motif with allele-specific binding at rs13239597 was retained.

139

#### 140 **Comparison of *IRF5* expression between SLE patients and healthy samples**

141 We retrieved three SLE genome-wide gene expression datasets in whole blood samples from  
142 the Gene Expression Omnibus (GEO) repository, including 30 healthy controls and 99 SLE  
143 patients for GSE61635, 46 healthy controls and 96 patients for GSE39088 and 72 healthy

144 controls and 924 patients for GSE65391[34]. We compared the average expression level for  
145 all microarray probes on *IRF5* between SLE patients and healthy samples in each dataset  
146 using two-tailed student's T test, respectively.

147

#### 148 **Culture of cell lines**

149 The EBV-transformed B lymphocyte cells (Raji), the human embryonic kidney 293T cells  
150 (HEK293T) and the human bone osteosarcoma epithelial cells (U2OS) were purchased from  
151 the American Type Culture Collection (ATCC, USA) and cultured in RPMI-1640 (Roswell  
152 Park Memorial Institute Medium) medium for Raji and U2OS cells and DMEM (Dulbecco's  
153 Modified Eagle's Medium) medium for HEK293T cells supplemented with 10% fetal bovine  
154 serum (FBS) (Invitrogen, USA), 100U/mL penicillin and 0.1 mg/mL streptomycin in 5% CO<sub>2</sub>  
155 at 37°C incubator.

156

#### 157 **Genotyping of rs13239597**

158 To measure genotypes of rs13239597 over Raji, HEK293T and U2OS cell lines, we extracted  
159 the human genomic DNAs from each cell line and amplified the fragment surrounding  
160 rs13239597 using the same primers used in the Luciferase expression plasmid constructs  
161 (Table S3). The amplified DNAs were digested with the restriction enzyme EcoRV, followed  
162 by the 1% gel electrophoresis analysis and further confirmed by sequencing.

163

#### 164 **Luciferase expression plasmid constructs**

165 A 1000-bp putative enhancer fragment containing the reference or alternate allele of  
166 rs13239597, a 1323-bp promoter fragment surrounding *IRF5* transcription start site, as well  
167 as a 1137-bp promoter fragment surrounding *TNPO3* transcription start site were amplified  
168 using PCR from healthy human genomic DNA (Table S3). The amplified enhancer and *IRF5*

169 promoter fragments were ligated and cloned into the enzyme cut sites MluI and HindIII of  
170 pGL3-basic vector. The individual *IRF5* or *TNPO3* promoter fragment was cloned into the  
171 enzyme cut sites SmaI and HindIII or XhoI and HindIII of pGL3-basic vector as the baseline  
172 control, respectively. We also amplified a 1698-bp fragment including both rs13239597  
173 enhancer and *TNPO3* promoter and cloned it into the enzyme cut sites MluI and HindIII of  
174 pGL3-basic vector (Table S3). The site-directed mutagenesis was used to generate the  
175 constructs containing the other allele not amplified from initial cloning with the Quick  
176 Change II Site-Directed Mutagenesis Kit (Agilent Technology, USA). All the constructed  
177 plasmids were validated by sequencing and did not contain any other sequence variations.  
178 The primers used in these constructs were listed in Table S3.

179

#### 180 **Transfection, electroporation and dual-luciferase reporter assays**

181 The constructed expression plasmids were transfected into HEK293T and U2OS cells by  
182 using ViaFect™ transfection reagent (Promega, USA) according to the manufacturer's  
183 instructions. Celetrix electroporation method was used to transfect the expression plasmids  
184 into Raji cells according to the manufacturer's instructions using the electroporation machine  
185 (Catalog# CTX-1500A LE), the pressured electroporation tubes (Catalog# 12-0107), and the  
186 electroporation buffer (Catalog# 13-0104) (Celetrix LLC, USA). 5-8 million of Raji cells  
187 were used to transfect 2 µg of expression plasmids by using 320 volt. An internal control  
188 reporter vector, pRL-TK containing *Renilla* luciferase (Promega, USA), was simultaneously  
189 transfected into the cells with expression plasmids as an internal control for assay-to-assay  
190 variability. And then, the transfected cells were incubated in 5% CO<sub>2</sub> at 37°C incubator. After  
191 48h of transfection, the cells were harvested and investigated for luciferase activity using the  
192 Dual-Luciferase Reporter Assay System (Promega, USA). Luciferase activity was  
193 normalized through division of major or minor allele construct luciferase signals by pRL-TK



194 luciferase signals. The mean and standard error of measurement were calculated on the basis  
195 of the normalized luciferase activities. The results were obtained from three independent  
196 experiments and each experiment was done in triplicate.

197

#### 198 **shRNA expression plasmid constructs and shRNA knockdown**

199 For shRNA knockdown of transcription factor EVI1 and *TNPO3*, the two independent miR-  
200 30-styled short hairpin RNAs (shRNA-1 and shRNA-2) expression plasmids were  
201 constructed by using EVI1- or *TNPO3*-targeted sense and antisense oligonucleotides. Each  
202 pair of sense and antisense oligonucleotides were connected with miR30 backbone according  
203 to the previous protocol [35]. Each resulted miR-30 styled shRNA was amplified with the  
204 primers shown in Table S3 and purified to be cloned into XhoI and EcoRI enzyme sites of  
205 pcDNA3.1 vector (Invitrogen, Carlsbad, USA). For the negative control (NC), shRNA NC  
206 expression plasmid was also constructed in the same way. 2 µg of each plasmid (shRNA 1,  
207 shRNA 2 and shRNA NC) were independently transfected into 70-80% confluence of  
208 HEK293T cells or U2OS cells by using ViaFect™ transfection reagent (Promega, USA)  
209 according to the manufacturer's instruction. After 48h of transfection, total RNA was isolated  
210 to detect the mRNA expression by RT-qPCR. Moreover, EVI1 shRNA plasmids were  
211 independently co-transfected with the expression plasmid including rs13239597-C allele or  
212 rs13239597-A allele with *IRF5* promoter used in the luciferase reporter assay. The  
213 transfection and measuring of luciferase activity are the same as indicated in dual-luciferase  
214 reporter assay section. The results were obtained from three independent experiments and  
215 each experiment was done in triplicate.

216

#### 217 **Enhancer deletion by CRISPR-Cas9**

218 To efficiently eliminate the enhancer fragment (1000-bp) residing rs13239597, CRISPR-  
219 associated RNA-guided endonuclease Cas9 cleavage technology was used [36]. Briefly, we  
220 first designed a set of single-guided RNAs (sgRNAs) targeting 8 sites around upstream and  
221 downstream of the enhancer fragment by using the CRISPR design platform (V1 tool)  
222 maintained by the Zhang Lab at the Board Institute. Oligonucleotides containing these  
223 sgRNAs were cloned into the BsaI enzyme site of pUC19-hU6-sgRNA backbone vector and  
224 then, the same amount of each sgRNA plasmid with pCas9 plasmid (Addgene plasmid #  
225 42876) were co-transfected into HEK293T cells using ViaFect™ transfection reagent  
226 (Promega, USA) according to the manufacturer's instruction. After 72h transfection, the  
227 genomic DNA were extracted, followed by PCR amplification of target fragment and T7  
228 endonuclease I assay to quantify the indel (insertion and deletion) percentage as previously  
229 described. From these results, the best pair of sgRNAs including upstream sgRNA (491-bp  
230 far from rs13239597) and downstream sgRNA (444-bp far from rs13239597) was chosen and  
231 cloned together into KpnI and NheI enzyme cut sites of lentiCRISPR v2 plasmid (Addgene  
232 plasmid # 52961). This resulted plasmid transfection into HEK293T and U2OS cells and  
233 electroporation into Raji cells were performed the same as mentioned in Luciferase reporter  
234 assay. After selection with puromycin (2 mg/ml), the cells were harvested for DNA and total  
235 RNA extraction for further analysis. The results were obtained from three independent  
236 experiments and each experiment was done in triplicate. sgRNAs primers and PCR primers  
237 are listed in Table S3.

238

### 239 **Chromosome Conformation Capture (3C) Assay**

240 The 3C assay was performed as described previously [37] in Raji and U2OS cell lines.  
241 Briefly, approximately  $1 \times 10^8$  cells were fixed with 1% formaldehyde for 10 min and stopped  
242 the fixation reaction by quenching with 2.5 M glycine. The cells were lysed using lysis buffer

243 (10mM Tris-HCL-pH8.0, 10mM NaCL, 0.2% Igepal and autoclaved water) and 200  $\mu$ l of 10  
244 x proteinase inhibitors and fractionated using a Dounce homogenizer for nuclear fraction.  
245 After washing the pellet two times with 1ml of 1 x NEB buffer 2.1 (New England BioLabs  
246 (NEB), USA), the nuclear lysates were digested with 800U KpnI (NEB) overnight at 37°C  
247 and 950 rpm, followed by the inactivation with 86  $\mu$ l of 10% SDS for 30 min at 65°C. The  
248 cross-linked digested DNA were re-ligated with each 800U T4 DNA ligase (NEB) in 7 ml of  
249 ligation cocktail including 1.1 x ligation buffer (NEB) and 10% Triton X-100 for 2 hours at  
250 16°C. The ligated samples were treated two times with fresh 10mg/ml proteinase K solution  
251 per tube and incubated at 65°C for 4 hours and overnight respectively. DNA was extracted  
252 with phenol-chloroform and precipitated with ethanol-acetate. Quantification of 3C  
253 interaction products were undertaken by PCR followed by agarose gel electrophoresis and  
254 qPCR amplifications for all possible ligation sites using candidate primer pairs listed in Table  
255 S3.

256

### 257 **Chromatin Immunoprecipitation (ChIP) Assay**

258 ChIP followed by allele-specific quantitative PCR (ChIP AS-qPCR) [38] were performed in  
259 U2OS cell line by using SimpleChIP<sup>®</sup> Enzymatic Chromatin IP Kit (Magnetic Beads)  
260 (Catalog# 9003) (Cell Signaling Technology, USA) according to the manufacturer's  
261 instruction. Briefly, approximately 30-50 million cells were cross-linked with 1%  
262 formaldehyde for 10 min and stopped the fixation reaction by quenching with 10 x glycine.  
263 DNA were digested with 0.4  $\mu$ l of Micrococcal nuclease per tube for 20 min at 37°C with  
264 frequent mixing every 3 min, followed by stopping the digestion with 0.5M EDTA. The  
265 nuclear pellet was incubated in ChIP buffer with protease inhibitor cocktail for 10 min,  
266 followed by the sonication with 3 sets of 5 sec pulses and 30 sec pauses using an ultrasonic  
267 sonicator. The cross-linked chromatin were immunoprecipitated with ChIP grade Evi1

268 antibody (Santa Cruz Biotechnology, Texas, USA) or Histone H3 rabbit antibody as a  
269 positive control or normal rabbit immunoglobulin (*IgG*) as a negative control overnight at  
270 4°C with rotation. Protein-DNA cross-links were precipitated by using ChIP-Grade Protein G  
271 Magnetic Beads. After reversal of protein-DNA cross-links by 5M NaCl and proteinase K,  
272 the DNA is purified using DNA purification spin columns. Following quantification was  
273 undertaken by ChIP AS-qPCR analysis with allele-specific primers listed in Table S3.

274

### 275 **DNA and RNA isolation and Quantitative Real-time PCR**

276 The genomic DNA was isolated from the cells using Tiangen genomic DNA extraction Kit  
277 (Catalog#DP304, TianGen Biotech, China) according to the manufacturer's instruction. The  
278 total RNA from the cells was isolated with TRIzol reagent (Invitrogen, USA), and 5 µg of  
279 total RNA per reaction were used to synthesize the complementary DNA (cDNA) with the  
280 Super Scripts II First-Strand cDNA synthesis kit (Invitrogen, USA). RT-qPCR was  
281 performed with QuantiTect SYBR Green PCR Kit (QIAGEN, Germany) according to the  
282 manufacturer's instruction by CFX Connect™ Real-Time PCR Detection System (Bio-Rad,  
283 USA) with the primers listed in Table S3. Samples were tested in a 96-well format in  
284 triplicate. The housekeeping gene Glyceraldehyde 3- phosphate dehydrogenase (*GAPDH*)  
285 was used as an endogenous control to normalize the differences in treatment, amount of input  
286 cDNA and the amplification signal between the samples of different cell lines.

287

### 288 **Statistical Analysis**

289 The mRNA expressions were calculated with  $2^{-\Delta\Delta Ct}$  method as previously described [39].  
290 Data were displayed as  $\pm$  standard deviation ( $\pm SD$ ) and unpaired, two-tailed student's T test  
291 was used to calculate *P* value. Every analytical data were obtained from three independent  
292 experiments and each experiment was done in triplicate.

293

## 294 **Results**

### 295 **Prioritizing rs13239597 as a potential functional independent variant through** 296 **combining genomic fine-mapping and functional epigenetic analyses**

297 To refine the independent association signals at 7q32.1 locus, we conducted a stepwise  
298 conditional association analysis using summarized GWAS data from 23,210 European  
299 samples [12]. Consistent with the previous study [8], we identified two independently  
300 associated signals within *IRF5* or *TNPO3* represented by 3 proxy SNPs (Figure 1). Adjusting  
301 the residual effect of 2 independent SNPs tagging association signal within *IRF5* retained 60  
302 conditionally significant associated SNPs within *TNPO3* ( $P < 1 \times 10^{-5}$ , Figure 1). We further  
303 performed Bayesian fine-mapping analysis, resulting in 33 SNPs composing 95% credible set  
304 of this independent association signal (Figure 1). The majority (27/33) of credible SNPs are  
305 in strong LD ( $r^2 > 0.8$ ) with the most significant one rs12531054 (Figure 1). Particularly, we  
306 found that rs13239597 was the most significant SNP across the whole genome associated  
307 with both SLE and SSc from another large-scale pan-meta-analysis in 21,109 samples [8]  
308 (Figure S1), indicating its high potential functionality.

309

310 To evaluate the functionality of SNPs, we leveraged functional epigenetic annotation in  
311 several immunologically related blood cell lines. We found that rs13239597 was located near  
312 or within multiple extremely strong epigenetic enhancer markers in several immunologically  
313 related cell lines (GM12878 lymphoblastoid cells, primary T cells and B cells), including the  
314 DNase I hypersensitivity (DHS), the histone markers (H3K27ac, H3K4me3), RNA  
315 polymerase II (Pol 2) and histone acetyltransferase p300 binding sites (Figure 1), which  
316 strongly supported its potential functionality. By contrast, both the lead SNP rs12531054 as  
317 well as other credible SNPs were depleted of these functional epigenetic markers (Figure 1).

318 Taken together, these analysis prioritized rs13239597 as a functional independent variant for  
319 further experimental validation.

320

### 321 **Identifying the candidate regulatory target gene of rs13239597**

322 Rs13239597 was located in the promoter region of *TNPO3*. We performed cis-eQTL analysis  
323 using the data from 373 unrelated European samples on lymphoblastoid (LCLs) cell lines  
324 [14]. Among 21 surrounding genes detected, we found that the minor allele of rs13239597  
325 (rs13239597-A) was exclusively and significantly associated with increased expression of  
326 *IRF5* (Bonferroni adjusted  $P = 1.742 \times 10^{-7}$ , Beta = 1.9) (Figure 2A and 2B; and Table 1).  
327 Consistent significantly reinforced effect of rs13239597-A allele on *IRF5* expression was  
328 observed on either LCLs from Genotype-Tissue Expression (GTEx) dataset [21] ( $P = 0.047$ ,  
329 Beta = 0.28, Figure 2C and Table 1) or 5,311 peripheral blood samples from an eQTL meta-  
330 analysis [22] ( $P = 6.97 \times 10^{-21}$ , Z-score < -9.37, Table 1). By contrast, no significant  
331 association between rs13239597 and *TNPO3* was detected in either 373 LCLs or GTEx LCLs  
332 datasets ( $P > 0.05$ , Figure 2B and 2C; and Table 1). We further explored eQTL association  
333 between rs13239597 genotype and *IRF5* or *TNPO3* expression in other GTEx tissues [21],  
334 and detected significantly increased effect of rs13239597-A allele on *IRF5* expression in 26  
335 different tissues ( $P < 0.05$ , Beta > 0), including some immunologically related tissues such as  
336 whole blood ( $P = 6.495 \times 10^{-4}$ , Beta = 0.191, Table S1) and thyroid ( $P = 9.283 \times 10^{-4}$ , Beta =  
337 0.248, Table S1). We also detected significant eQTL association between rs13239597  
338 genotype and *TNPO3* expression in 6 different GTEx tissues with discordant effect direction  
339 ( $P < 0.05$ , Beta > 0 for 3 tissues and Beta < 0 for another 3 tissues), including the whole  
340 blood ( $P = 2.481 \times 10^{-4}$ , Beta = -0.153, Table S1). Collectively, these eQTL results intensely  
341 highlighted *IRF5* as the candidate distal regulatory target gene of rs13239597.

342

343 **Validating the long-range chromatin interactions between rs13239597 and *IRF5***

344 The SNP rs13239597 was located ~118 kb far away from its candidate target gene *IRF5*. We  
345 therefore explored the potential long-range chromatin interactions between rs13239597 and  
346 *IRF5* using capture Hi-C and Hi-C data across multiple blood cell lines [23-26]. We observed  
347 that rs13239597 strongly interacted with the distal gene *IRF5* in five different cell lines  
348 (GM12878, CD34, K562, IMR90 and MCF7) (Figure 3A and Table S2). We also analyzed  
349 topologically associating domains (TADs) surrounding rs13239597 locus, and found that  
350 rs1323957-*IRF5* circuit was located within a conserved TAD with a size of 1.16 Mb in  
351 IMR90 cells (Figure 3B), further supported the distal chromatin interactions between them.

352

353 Genotyping assay revealed that B lymphocyte-derived Raji cell line is homozygous CC  
354 genotype for rs13239597 and U2OS cell line is heterozygous AC genotype for rs13239597  
355 (Figure 3C). To directly validate the chromatin interactions between rs13239597 and *IRF5*,  
356 we performed 3C assay in Raji cell line. When anchored at *IRF5* promoter, rs13239597  
357 enhancer region showed the strongest interaction with *IRF5* promoter region, compared with  
358 any of the other 10 neighboring KpnI sites tested (Figure 3D). Consistently, when anchored at  
359 rs13239597 enhancer region, *IRF5* promoter region showed the strongest interaction with  
360 rs13239597 enhancer region in comparison with other sites tested (Figure 3D). We also  
361 performed 3C assay in U2OS cell line, and detected relatively higher chromatin interactions  
362 between rs13239597 and *IRF5* compared with Raji cell line, which might indicate the  
363 superior allele-specific long-range chromatin loop formation between rs13239597-A and  
364 *IRF5*.

365

366 **Rs13239597 acts as an allele-specific enhancer regulating *IRF5* expression independent**  
367 **of *TNPO3***

368 To experimentally validate the allelic regulation between rs13239597 and *IRF5*, we  
369 compared the regulatory activity of genomic fragment containing different genotypes of  
370 rs13239597 on *IRF5* expression using dual-luciferase reporter assays in Raji cell line. We  
371 found that both alleles of rs13239597 could reinforce *IRF5* expression ( $P < 0.01$ , Figure 4A).  
372 Particularly, rs13239597-A allele had significantly enhanced effect on *IRF5* expression  
373 compared with rs13239597-C allele (Fold change = 2.06,  $P < 0.008$ , Figure 4A), which is  
374 consistent with our eQTL analysis results (Figure 2 and Table 1). Genotyping assay revealed  
375 that HEK293T cell line is homozygous CC genotype for rs13239597 (Figure S2). We further  
376 replicated luciferase assays in HEK293T cell lines. Consistent results were acquired in  
377 HEK293T cells in which significantly higher *IRF5* expression was observed on rs13239597-  
378 A allele compared with rs13239597-C allele (Fold change = 1.5,  $P < 0.01$ , Figure 4B).  
379 However, no significant enhanced luciferase activity was observed on rs13239597-C allele  
380 compared with the *IRF5* promoter-only plasmid ( $P > 0.05$ , Figure 4B). We also compared the  
381 luciferase activity of rs13239597-C or rs13239597-A allele on the nearby gene *TNPO3* in  
382 HEK293T cells, and detected no significant effect of rs13239597-A allele on *TNPO3*  
383 expression although different regulatory activities between two alleles of rs13239597 were  
384 detected ( $P < 0.02$ , Figure 4B). Collectively, these luciferase results suggested the allelic  
385 strong enhancer activity of rs13239597-A allele on *IRF5* instead of *TNPO3*.

386

387 To further validate the allelic enhancer activity of rs13239597 on *IRF5*, we deleted the  
388 genomic fragment harboring rs13239597 using CRISPR-Cas9 in three different cell lines  
389 (Raji, HEK293T and U2OS). We observed no significant alterations of *IRF5* expression in  
390 the rs13239597-CC deleted Raji and HEK293T cells as compared with wild type cells  
391 (Figure 4C and 4D). By contrast, we detected significantly decreased *IRF5* expression in the



392 rs13239597-AC deleted U2OS cell lines ( $P < 0.001$ , Figure 4E), supporting the allele-specific  
393 enhancer activity of rs13239597-A on *IRF5*.

394

395 We also detected significantly decreased expression of *TNPO3* in rs13239597-CC deleted  
396 cell lines (Figure 4C-4E), raising the question whether the detected regulatory activity of  
397 rs13239597 on *IRF5* was fictitious due to the intermediary effect of *TNPO3*. To further  
398 demonstrate the direct enhancer activity of rs13239597-A on *IRF5* independently of *TNPO3*,  
399 we firstly suppressed *TNPO3* expression in rs13239597-AC U2OS cells, and found no  
400 significant effect on *IRF5* expression (Figure 4F). We further deleted rs13239597-AC  
401 enhancer fragment in *TNPO3* suppressed U2OS cells, and detected significant decline of  
402 *IRF5* expression ( $P < 0.001$ , Figure 4G). Taken together, these experimental results  
403 prominently pinpointed that rs13239597 acted as allele-specific enhancer regulating *IRF5*  
404 expression independently of *TNPO3*.

405

#### 406 **EVI1 preferentially binds to rs13239597-A to augment *IRF5* expression**

407 We next explored the functional mechanism underlying rs13239597 as the strong allele-  
408 specific enhancer on *IRF5*. The motif analysis revealed that EVI1 could specifically bind to  
409 rs13239597-A allele (Figure 5A). To validate allelic binding affinity of EVI1 on rs13239597,  
410 we performed chromatin immunoprecipitation allele-specific quantitative PCR (ChIP AS-  
411 qPCR) assay in rs13239597-AC U2OS cell line. We found that EVI1 could bind to  
412 rs13239597 region in U2OS (Figure 5B). Particularly, EVI1 was preferentially recruited to  
413 the rs13239597-A allele compared with rs13239597-C allele (Fold change = 1.8,  $P < 0.001$ ,  
414 Figure 5B). To further assess the transcriptional influence of rs13239597 on *IRF5* expression  
415 mediated by EVI1, we suppressed EVI1 by shRNA in both U2OS cells and HEK293T cells.  
416 Compared with shRNA NC transfected cell lines, we detected significant decline of *IRF5*

417 expression in U2OS cells ( $P < 0.05$ , Figure 5C) while no obvious disturbance of *IRF5*  
418 expression in HEK293T cells (Figure 5D). We further co-transfected the EVI1 shRNA  
419 plasmids with rs13239597-A allele or rs13239597-C allele luciferase plasmids in HEK293T  
420 cells, and found that rs13239597-A allele significantly diminished *IRF5* expression ( $P < 0.01$ ,  
421 Figure 5E) in contrast to that rs13239597-C allele had no decreased *IRF5* expression (Figure  
422 5E), providing additional evidence for the allele-specific binding affinity of EVI1 to  
423 rs13239597-A. Taken together, we demonstrated that strong allele-specifically binding of  
424 EVI1 at the sequence harboring rs13239597-A allele could enhance expression of *IRF5*.

425

#### 426 **Differential expression of *IRF5* between SLE patients and healthy individuals**

427 To compare the *IRF5* expression between SLE patients and healthy individuals, we screened  
428 the *IRF5* expression in whole blood samples of three SLE genome-wide gene expression  
429 datasets (GSE61635, GSE39088 and GSE65391) [34]. Significantly higher *IRF5* expression  
430 was found in SLE patients compared with healthy individuals in all three datasets ( $P = 1.272$   
431  $\times 10^{-4}$  in GSE61635,  $P = 0.001$  in GSE39088 and  $P = 0.019$  in GSE65391, Figure 5F), which  
432 was consistent with that the risk allele-A of rs13239597 could augment *IRF5* expression.

433

#### 434 **Discussion**

435 GWASs have identified numerous SLE and SSc disease risk variants at *IRF5-TNPO3* locus  
436 of 7q32.1, however, the underlying functional mechanisms remain largely exclusive. Here,  
437 through the combination of a set of bioinformatics analyses and various experimental assays,  
438 we demonstrated that rs13239597 located in *TNPO3* promoter region functions as an allele-  
439 specific strong enhancer to directly modulate the distal gene *IRF5* by long-range chromatin  
440 loop formation. We corroborated that the enhancer activity of rs13239597 was elevated by  
441 the transcription factor EVI1 preferentially recruited to rs13239597-A allele, which

442 efficiently enhanced the *IRF5* expression. Taken together, our study highlighted the allele-  
443 specific functional role of rs13239597 leading to the *IRF5* hyperactivation followed by the  
444 production of pathogenic antibodies against self-tissues (Figure 6A).

445

446 Our analysis showed that a GWAS risk variant associated with both SLE and SSc could  
447 regulate *IRF5* expression via long-range loop formation. *IRF5* is a member of interferon  
448 regulatory factor (IRF) family which is the transcriptional regulators of Type I interferons  
449 (IFNs) playing crucial role in modulating inflammatory immune responses in numerous cell  
450 types, including dendritic cells, macrophages and B cells [40]. Studies on murine models also  
451 indicated that *Irf*<sup>-/-</sup> mice could result in poor lymphocyte activation, decreased autoantibody  
452 levels [41] and significant lower production of IFN-I and key cytokines (IL-12 and IL-23)  
453 that link innate immunity to SLE pathogenesis [42]. Consistently, our analysis demonstrated  
454 that the risk allele of rs13239597 could augment *IRF5* expression, and *IRF5* was significantly  
455 higher expressed in SLE patients compared with healthy individuals [34].

456

457 Regulation of mammalian gene transcription is accomplished by proximal promoter and  
458 distal enhancer, which had noticeable functional similarities such as DNase I hypersensitivity,  
459 histone modification patterns and transcription factor binding sites [43]. Dao *et al.* recently  
460 verified the functional mechanisms of Epromoters referred to as the promoters with enhancer  
461 functions, suggesting that regulatory elements with dual roles as transcriptional promoters  
462 and enhancers were strongly involved in *cis* regulation of distal gene expression in natural  
463 context [44]. Recently, the functional SNPs with both promoter and enhancer activities were  
464 reported [45], in which different alleles of a SNP mechanistically perform different functions.  
465 In our study, rs13239597 located in the promoter region of *TNPO3* functions as an allele-  
466 specific functional enhancer, which highlights dual roles of its functionality.

467

468 Our study revealed that the transcription factor EVI1 could preferentially bind to rs13239597-  
469 A allele to increase *IRF5* expression. EVI1 is crucial for hematopoietic stem cells originating  
470 in bone marrow [46], which give rise to production of human lymphoid cells including T  
471 cells, B cells and natural killer cells [47]. Many IRF family members play important roles in  
472 the differentiation of hematopoietic cells [48]. A recent SLE and SSc combined meta-analysis  
473 revealed that the minor rs13239597-A allele could increase disease risk (OR = 1.848 for SLE  
474 and OR = 1.567 for SSc) [8]. Consistently, our study revealed that EVI1 strongly binds to the  
475 risk allele (rs13239597-A) and subsequently promotes *IRF5* expression, high expression of  
476 which produces pathogenic antibodies leading to SLE and SSc.

477

478 In summary, we provided a new mechanistic insight that rs13239597 acts as an allele-specific  
479 strong enhancer to directly regulate *IRF5* expression mediated by EVI1. We established the  
480 feasible approach to investigate the role of a noncoding functional variant and its target distal  
481 gene through a series of integrated bioinformatics data analyses and various functional assays.  
482 We anticipate that the similar approach could be the further investigation of functional  
483 mechanisms underlying disease risk variants associated with more human complex diseases  
484 to fulfill the gap of GWASs. We believe that our findings might fulfill the current issues  
485 towards the understanding of complex genetic architecture and the promising therapeutic  
486 target for both SLE and SSc autoimmune diseases.

487

#### 488 **Supplemental Data**

489 Supplemental Data include two figures and three tables.

490

#### 491 **Web Resources**

492 1000 Genomes V3 genotype data,  
493 <ftp://ftp.trace.ncbi.nih.gov/1000genomes/ftp/release/20130502/>  
494 4DGenome, <https://4dgenome.research.chop.edu/>  
495 ArrayExpress (E-GEUV-1), <http://www.ebi.ac.uk/arrayexpress/experiments/E-GEUV-1/>  
496 CRISPR design platform (V1 tool), <http://crispr.mit.edu/>  
497 dbGaP, <https://www.ncbi.nlm.nih.gov/gap>  
498 GEO, <https://www.ncbi.nlm.nih.gov/gds/>  
499 GTEx Portal, <https://www.gtexportal.org/home/>  
500 GWAS Catalog, <http://www.ebi.ac.uk/gwas/>  
501 HaploReg, <http://www.broadinstitute.org/mammals/haploreg/haploreg.php>  
502 LocusZoom, <http://locuszoom.sph.umich.edu/>  
503 MEME Suite, <http://meme-suite.org/>  
504 OMIM, <http://www.omim.org/>  
505 PLINK, <http://zzz.bwh.harvard.edu/plink/>  
506 R statistical software, <https://www.r-project.org/>  
507 SLE GWAS data, <http://insidegen.com/insidegen-LUPUS-data.html>  
508 UCSC ENCODE download portal, <https://genome.ucsc.edu/encode/downloads.html>  
509 Vcftools, <http://vcftools.sourceforge.net/>  
510 WashU Epigenome Browser (v46.1), <http://epigenomegateway.wustl.edu/browser/>

511

## 512 **Declaration of Interests**

513 The authors declare no competing interests.

514

## 515 **Acknowledgements**

516 Not Applicable.

517

518 **Authors' contributions**

519 TLY and YG designed and supervised the project. HNT designed and performed the  
520 experiments and wrote the manuscript. XFC conducted the data analysis and revised the  
521 manuscript. WXH, YYD, DLZ, HC, NNW and HHC contributed to design the experiments.  
522 Other authors contributed to the manuscript preparation. All authors read and approved the  
523 final manuscript.

## 524 **References**

- 525 1. Scherlinger, M., et al., *Systemic lupus erythematosus and systemic sclerosis: All roads lead to*  
526 *platelets*. Autoimmunity Reviews, 2018. **17**(6): p. 625-635.
- 527 2. Hayter, S.M. and M.C. Cook, *Updated assessment of the prevalence, spectrum and case*  
528 *definition of autoimmune disease*. Autoimmunity Reviews, 2012. **11**(10): p. 754-765.
- 529 3. Rueda, B., et al., *The STAT4 gene influences the genetic predisposition to systemic sclerosis*  
530 *phenotype*. Hum Mol Genet, 2009. **18**(11): p. 2071-7.
- 531 4. Abelson, A.K., et al., *STAT4 associates with systemic lupus erythematosus through two*  
532 *independent effects that correlate with gene expression and act additively with IRF5 to*  
533 *increase risk*. Ann Rheum Dis, 2009. **68**(11): p. 1746-53.
- 534 5. Radstake, T.R., et al., *Genome-wide association study of systemic sclerosis identifies CD247*  
535 *as a new susceptibility locus*. Nat Genet, 2010. **42**(5): p. 426-9.
- 536 6. Graham, R.R., et al., *A common haplotype of interferon regulatory factor 5 (IRF5) regulates*  
537 *splicing and expression and is associated with increased risk of systemic lupus erythematosus*.  
538 Nat Genet, 2006. **38**(5): p. 550-5.
- 539 7. Kottyan, L.C., et al., *The IRF5-TNPO3 association with systemic lupus erythematosus has two*  
540 *components that other autoimmune disorders variably share*. Hum Mol Genet, 2015. **24**(2): p.  
541 582-96.
- 542 8. Martin, J.E., et al., *A systemic sclerosis and systemic lupus erythematosus pan-meta-GWAS*  
543 *reveals new shared susceptibility loci*. Hum Mol Genet, 2013. **22**(19): p. 4021-9.
- 544 9. Kawai, T. and S. Akira, *The role of pattern-recognition receptors in innate immunity: update*  
545 *on Toll-like receptors*. Nat Immunol, 2010. **11**(5): p. 373-84.
- 546 10. Palstra, R.J., et al., *Allele-specific long-distance regulation dictates IL-32 isoform switching*  
547 *and mediates susceptibility to HIV-1*. Sci Adv, 2018. **4**(2): p. e1701729.
- 548 11. Gao, P., et al., *Biology and Clinical Implications of the 19q13 Aggressive Prostate Cancer*  
549 *Susceptibility Locus*. Cell, 2018. **174**(3): p. 576-589.e18.
- 550 12. Bentham, J., et al., *Genetic association analyses implicate aberrant regulation of innate and*  
551 *adaptive immunity genes in the pathogenesis of systemic lupus erythematosus*. Nat Genet,  
552 2015. **47**(12): p. 1457-64.
- 553 13. Ward, L.D. and M. Kellis, *HaploReg v4: systematic mining of putative causal variants, cell*  
554 *types, regulators and target genes for human complex traits and disease*. Nucleic Acids Res,  
555 2016. **44**(D1): p. D877-81.
- 556 14. Sudmant, P.H., et al., *An integrated map of structural variation in 2,504 human genomes*.  
557 Nature, 2015. **526**(7571): p. 75-81.
- 558 15. Yang, J., et al., *Conditional and joint multiple-SNP analysis of GWAS summary statistics*  
559 *identifies additional variants influencing complex traits*. Nat Genet, 2012. **44**(4): p. 369-75,  
560 s1-3.
- 561 16. Yang, J., et al., *GCTA: a tool for genome-wide complex trait analysis*. Am J Hum Genet, 2011.  
562 **88**(1): p. 76-82.
- 563 17. ARICinvestigators, *The Atherosclerosis Risk in Communities (ARIC) Study: design and*  
564 *objectives*. The ARIC investigators. Am J Epidemiol, 1989. **129**(4): p. 687-702.
- 565 18. Maller, J.B., et al., *Bayesian refinement of association signals for 14 loci in 3 common*  
566 *diseases*. Nat Genet, 2012. **44**(12): p. 1294-301.
- 567 19. ENCODE\_Project\_Consortium, *An integrated encyclopedia of DNA elements in the human*  
568 *genome*. Nature, 2012. **489**: p. 57.
- 569 20. Lappalainen, T., et al., *Transcriptome and genome sequencing uncovers functional variation*  
570 *in humans*. Nature, 2013. **501**(7468): p. 506-11.
- 571 21. eGTExProject, *Enhancing GTEx by bridging the gaps between genotype, gene expression, and*  
572 *disease*. Nat Genet, 2017. **49**(12): p. 1664-1670.
- 573 22. Westra, H.J., et al., *Systematic identification of trans eQTLs as putative drivers of known*  
574 *disease associations*. Nat Genet, 2013. **45**(10): p. 1238-1243.

- 575 23. Rao, S.S., et al., *A 3D map of the human genome at kilobase resolution reveals principles of*  
576 *chromatin looping*. Cell, 2014. **159**(7): p. 1665-80.
- 577 24. Mifsud, B., et al., *Mapping long-range promoter contacts in human cells with high-resolution*  
578 *capture Hi-C*. Nat Genet, 2015. **47**(6): p. 598-606.
- 579 25. Jin, F., et al., *A high-resolution map of the three-dimensional chromatin interactome in*  
580 *human cells*. Nature, 2013. **503**(7475): p. 290-4.
- 581 26. Teng, L., et al., *4DGenome: a comprehensive database of chromatin interactions*.  
582 *Bioinformatics*, 2015. **31**(15): p. 2560-4.
- 583 27. Tang, Z., et al., *CTCF-Mediated Human 3D Genome Architecture Reveals Chromatin Topology*  
584 *for Transcription*. Cell, 2015. **163**(7): p. 1611-27.
- 585 28. Quinlan, A.R. and I.M. Hall, *BEDTools: a flexible suite of utilities for comparing genomic*  
586 *features*. Bioinformatics, 2010. **26**(6): p. 841-2.
- 587 29. Dixon, J.R., et al., *Topological domains in mammalian genomes identified by analysis of*  
588 *chromatin interactions*. Nature, 2012. **485**(7398): p. 376-80.
- 589 30. Bailey, T.L., et al., *MEME SUITE: tools for motif discovery and searching*. Nucleic Acids Res,  
590 2009. **37**(Web Server issue): p. W202-8.
- 591 31. Mathelier, A., et al., *JASPAR 2016: a major expansion and update of the open-access*  
592 *database of transcription factor binding profiles*. Nucleic Acids Res, 2016. **44**(D1): p. D110-5.
- 593 32. Kulakovskiy, I.V., et al., *HOCOMOCO: expansion and enhancement of the collection of*  
594 *transcription factor binding sites models*. Nucleic Acids Res, 2016. **44**(D1): p. D116-25.
- 595 33. Pachkov, M., et al., *SwissRegulon, a database of genome-wide annotations of regulatory*  
596 *sites: recent updates*. Nucleic Acids Res, 2013. **41**(Database issue): p. D214-20.
- 597 34. Yan, S., et al., *Key genes and functional coexpression modules involved in the pathogenesis of*  
598 *systemic lupus erythematosus*. J Cell Physiol, 2018.
- 599 35. Paddison, P.J., et al., *Cloning of short hairpin RNAs for gene knockdown in mammalian cells*.  
600 *Nat Methods*, 2004. **1**(2): p. 163-7.
- 601 36. Ran, F.A., et al., *Genome engineering using the CRISPR-Cas9 system*. Nat Protoc, 2013. **8**(11):  
602 p. 2281-2308.
- 603 37. Cope, N.F. and P. Fraser, *Chromosome conformation capture*. Cold Spring Harb Protoc, 2009.  
604 **2009**(2): p. pdb prot5137.
- 605 38. Huang, Q., et al., *A prostate cancer susceptibility allele at 6q22 increases RFX6 expression by*  
606 *modulating HOXB13 chromatin binding*. Nature Genetics, 2014. **46**: p. 126.
- 607 39. Schmittgen, T.D. and K.J. Livak, *Analyzing real-time PCR data by the comparative CT method*.  
608 *Nature Protocols*, 2008. **3**(6): p. 1101-1108.
- 609 40. Xu, W.-D., et al., *Interferon regulatory factor 5 and autoimmune lupus*. Expert Reviews in  
610 *Molecular Medicine*, 2013. **15**.
- 611 41. Tada, Y., et al., *Interferon regulatory factor 5 is critical for the development of lupus in*  
612 *MRL/lpr mice*. Arthritis Rheum, 2011. **63**(3): p. 738-48.
- 613 42. Xu, Y., et al., *Pleiotropic IFN-Dependent and -Independent Effects of IRF5 on the Pathogenesis*  
614 *of Experimental Lupus*. The Journal of Immunology, 2012. **188**(8): p. 4113.
- 615 43. Kim, T.K. and R. Shiekhhattar, *Architectural and Functional Commonalities between Enhancers*  
616 *and Promoters*. Cell, 2015. **162**(5): p. 948-59.
- 617 44. Dao, L.T.M., et al., *Genome-wide characterization of mammalian promoters with distal*  
618 *enhancer functions*. Nature Genetics, 2017. **49**: p. 1073.
- 619 45. Hua, J.T., et al., *Risk SNP-Mediated Promoter-Enhancer Switching Drives Prostate Cancer*  
620 *through lncRNA PCAT19*. Cell, 2018. **174**(3): p. 564-575.e18.
- 621 46. Goyama, S., et al., *Evi-1 is a critical regulator for hematopoietic stem cells and transformed*  
622 *leukemic cells*. Cell Stem Cell, 2008. **3**(2): p. 207-20.
- 623 47. Blom, B. and H. Spits, *Development of human lymphoid cells*. Annu Rev Immunol, 2006. **24**: p.  
624 287-320.



- 625 48. Tamura, T., et al., *The IRF family transcription factors in immunity and oncogenesis*. Annu  
626 Rev Immunol, 2008. **26**: p. 535-84.
- 627

628 **Figure Titles and Legends**

629 **Figure 1. Prioritizing rs13239597 as a potential independent functional variant at**  
630 **7q32.1 locus.**

631 The upper regional plots show the multi-step fine-mapping analysis results at 7q32.1 locus.  
632 The first inverted triangle shows haplotype block for all selected SNPs using 1000 genome-  
633 V3 European data [14]. The first regional plot shows stepwise conditional association  
634 analysis results, indicating 3 independently associated SNPs ( $p < 5 \times 10^{-8}$ ) located at 7q32.1  
635 locus. The middle regional plot shows conditional association signals after adjusting 2 of 3  
636 independently associated SNPs near *IRF5*. The last regional plot shows Bayesian analysis [18]  
637 for the conditional association signals in the previous step. All regional plots are visualized  
638 using LocusZoom. The bottom part shows several active epigenetic annotation in three  
639 immunologically related blood cell lines for the independent associated region surrounding  
640 *TNPO3*. Related epigenetic data were visualized using WashU Epigenome Browser (v46.1),  
641 including DNase I hypersensitivity (DHS), the histone markers H3K27ac and H3K4me3,  
642 RNA polymerase II (Pol 2) and histone acetyltransferase p300 binding sites. The lead SNP  
643 rs12531054 region (pale blue) and our prioritized SNP rs13239597 region (pale yellow) are  
644 highlighted.

645

646 **Figure 2. eQTL analysis demonstrates *IRF5* as a distal regulatory target gene for**  
647 **rs13239597.**

648 (A) Cis-eQTL analysis between rs13239597 genotype and 21 nearby genes (within 1000 kb)  
649 in lymphoblastoid (LCLs) cell lines from 373 unrelated samples [14]. The beta value  
650 represents the effect size for minor allele of rs13239597, and the dashed line represents the  
651 significant level after Bonferroni adjustment (Bonferroni adjusted  $P < 0.05$ ).

652 (B and C) Box plots show the comparison of *IRF5* or *TNPO3* expression with different  
653 genotypes (AA, AC and CC) of rs13239597 in lymphoblastoid (LCLs) cell lines from 373  
654 unrelated European samples[14] (B) and in EBV-transformed lymphoblastoid cell lines (C)  
655 from GTEx[21]. The eQTL *P* values and sample count numbers (n) are shown.

656

657 **Figure 3. Validation of direct long-range chromatin interaction between rs13239597 and**  
658 ***IRF5*.**

659 (A) Hi-C interaction between rs13239597 and its distal target gene *IRF5*. Different colors of  
660 interacted lines between rs13239597 and *IRF5* indicate different five cell lines including  
661 K562, MCF7, IMR90, CD34 and GM12878 cell lines.

662 (B) The looping interaction between rs13239597 and *IRF5* is located within the same  
663 topologically associated domain (TAD) with a size of 1.16 Mb in IMR90 cells.

664 (C) Genotyping results of rs13239597 in Raji and U2OS cell lines.

665 (D) Chromatin conformation capture (3C) assay in Raji cells (dark blue color line) and U2OS  
666 cells (orange color line). The interaction frequencies are shown between the region including  
667 *IRF5* promoter as the anchor point (upper) or the region harboring rs13239597 as the anchor  
668 point (lower) with other 10 neighboring KpnI sites (~100 kb upstream of *IRF5* and ~100 kb  
669 downstream of rs13239597) as the negative controls. Error bars are standard deviation (SD).

670 Data are obtained from at least three replicates ( $n \geq 3$ ).

671

672 **Figure 4. Validation of allele-specific enhancer activity of rs13239597 on *IRF5***  
673 **expression.**

674 (A) Dual-luciferase reporter assays in Raji. The pGL3-basic vectors were constructed with  
675 *IRF5* promoter region and the region surrounding rs13239597-C or rs13239597-A,  
676 respectively. Luciferase signals are normalized to *Renilla* signals.

677 (B) Dual-luciferase reporter assays in HEK293T cell lines. The pGL3-basic vectors were  
678 constructed with *IRF5* promoter region or *TNPO3* promoter region and the region  
679 surrounding rs13239597-C or rs13239597-A, respectively. Luciferase signals are normalized  
680 to *Renilla* signals.

681 (C-E) Effect of deletion of the region residing rs13239597 by CRISPR-cas9 on *IRF5* and  
682 *TNPO3* expression in Raji (C), HEK293T (D) and U2OS (E) cell lines, respectively. Non-  
683 treated Raji, HEK293T and U2OS wild type (WT) cell lines are used as controls.

684 (F) Effect of *TNPO3* knockdown on *IRF5* expression. Two independent shRNAs (shRNA-1  
685 and shRNA-2) are used. shRNA-NC is used as the negative control.

686 (G) Effect of deletion of the region residing rs13239597 by CRISPR-cas9 on *IRF5* on the  
687 basis of *TNPO3* knockdown in U2OS cell lines. Two independent shRNAs (shRNA-1 and  
688 shRNA-2) are used.

689 Error bars, SD.  $n \geq 3$ .  $*P \leq 0.05$ ,  $**P \leq 0.01$ ,  $***P \leq 0.001$  are determined by unpaired, two-  
690 tailed student's T test. The samples are normalized by housekeeping gene *GAPDH*.

691

692 **Figure 5. Preferential binding of EVI1 to rs13239597-A allele and increased *IRF5***  
693 **expression in SLE patients.**

694 (A) EVI1 motif analysis for the sequences surrounding rs13239597.

695 (B) Allele-specific ChIP assay for the comparison of EVI1 binding between rs13239597-C  
696 allele and rs13239597-A allele in U2OS cell line. Primers specifically targeting to  
697 rs13239597-C or rs13239597-A or *RPL30* exon (NC) region are used. The binding efficiency  
698 of EVI1 is shown as fold enrichment over *IgG*.

699 (C and D) Effect of EVI1 knockdown on *IRF5* expression in U2OS (C) or HEK293T (D),  
700 respectively. Two independent shRNAs (shRNA-1 and shRNA-2) are used. The samples are  
701 normalized by housekeeping gene *GAPDH*.

702 (E) Dual-luciferase reporter assay containing rs13239597-C allele or rs13239597-A allele  
703 plasmids co-transfected with two independent shRNA knockdown of EVI1 (shRNA-1 or  
704 shRNA-2). The shRNA-NC is used as the negative control. Luciferase signals are normalized  
705 to *Renilla* signals (n = 3).

706 (F) Comparison of *IRF5* expression between healthy individuals and SLE patients in whole  
707 blood samples from three SLE genome-wide gene expression datasets (GSE61635,  
708 GSE39088 and GSE65391) [34] are shown.

709 Error bars, SD. n ≥ 3. \* $P \leq 0.05$ , \*\* $P \leq 0.01$ , \*\*\* $P \leq 0.001$  are determined by unpaired, two-  
710 tailed student's T test.

711

712 **Figure 6. A schematic proposed model between rs13239597 and *IRF5*.** The schematic  
713 model shows how a noncoding variant (rs13239597) influences the autoantibody production.  
714 The left panel shows rs13239597-A allele vigorously binds to EVI, which leads to *IRF5*  
715 hyperactivation via long-range chromatin loop formation, resulting in pathogenic  
716 autoantibody production against self-tissues. In contrast, the right panel shows rs13239597-C  
717 allele has a weaker activity of binding to EVI, which leads to *IRF5* normal activation,  
718 resulting in the protective autoantibody production against pathogens.

719

720 **Table**

721 **Table 1. Comparison of Cis-eQTL analysis results of rs13239597 from three datasets.**

| Gene         | 373 LCLs <sup>a</sup>  |        | GTEx LCLs <sup>b</sup> |        | Meta-analysis <sup>c</sup> |         |
|--------------|------------------------|--------|------------------------|--------|----------------------------|---------|
|              | <i>P</i> value         | Beta   | <i>P</i> value         | Beta   | <i>P</i> value             | Z-score |
| <i>IRF5</i>  | $1.742 \times 10^{-7}$ | 1.900  | 0.047                  | 0.276  | $6.97 \times 10^{-21}$     | -9.37   |
| <i>TNPO3</i> | 0.714                  | -0.111 | 0.589                  | -0.076 | NA                         | NA      |

722 Note: Cis-eQTL analysis results of rs13239597 for only *IRF5* and *TNPO3* expression were  
723 demonstrated in the table. <sup>a</sup> The data were obtained from 373 unrelated European samples on  
724 lymphoblastoid cell lines [14]. <sup>b</sup> The data were obtained from cells EBV-transformed lymphocytes of  
725 GTEx dataset [21]. <sup>c</sup> The data were obtained from peripheral blood samples of 5,311 individuals [22].  
726 eQTL results for *TNPO3* expression in meta-analysis were not available (NA).

Figure 1

bioRxiv preprint doi: <https://doi.org/10.1101/533661>; this version posted January 29, 2019. The copyright holder for this preprint (which was not certified by peer review) is the author/funder. All rights reserved. No reuse allowed without permission.

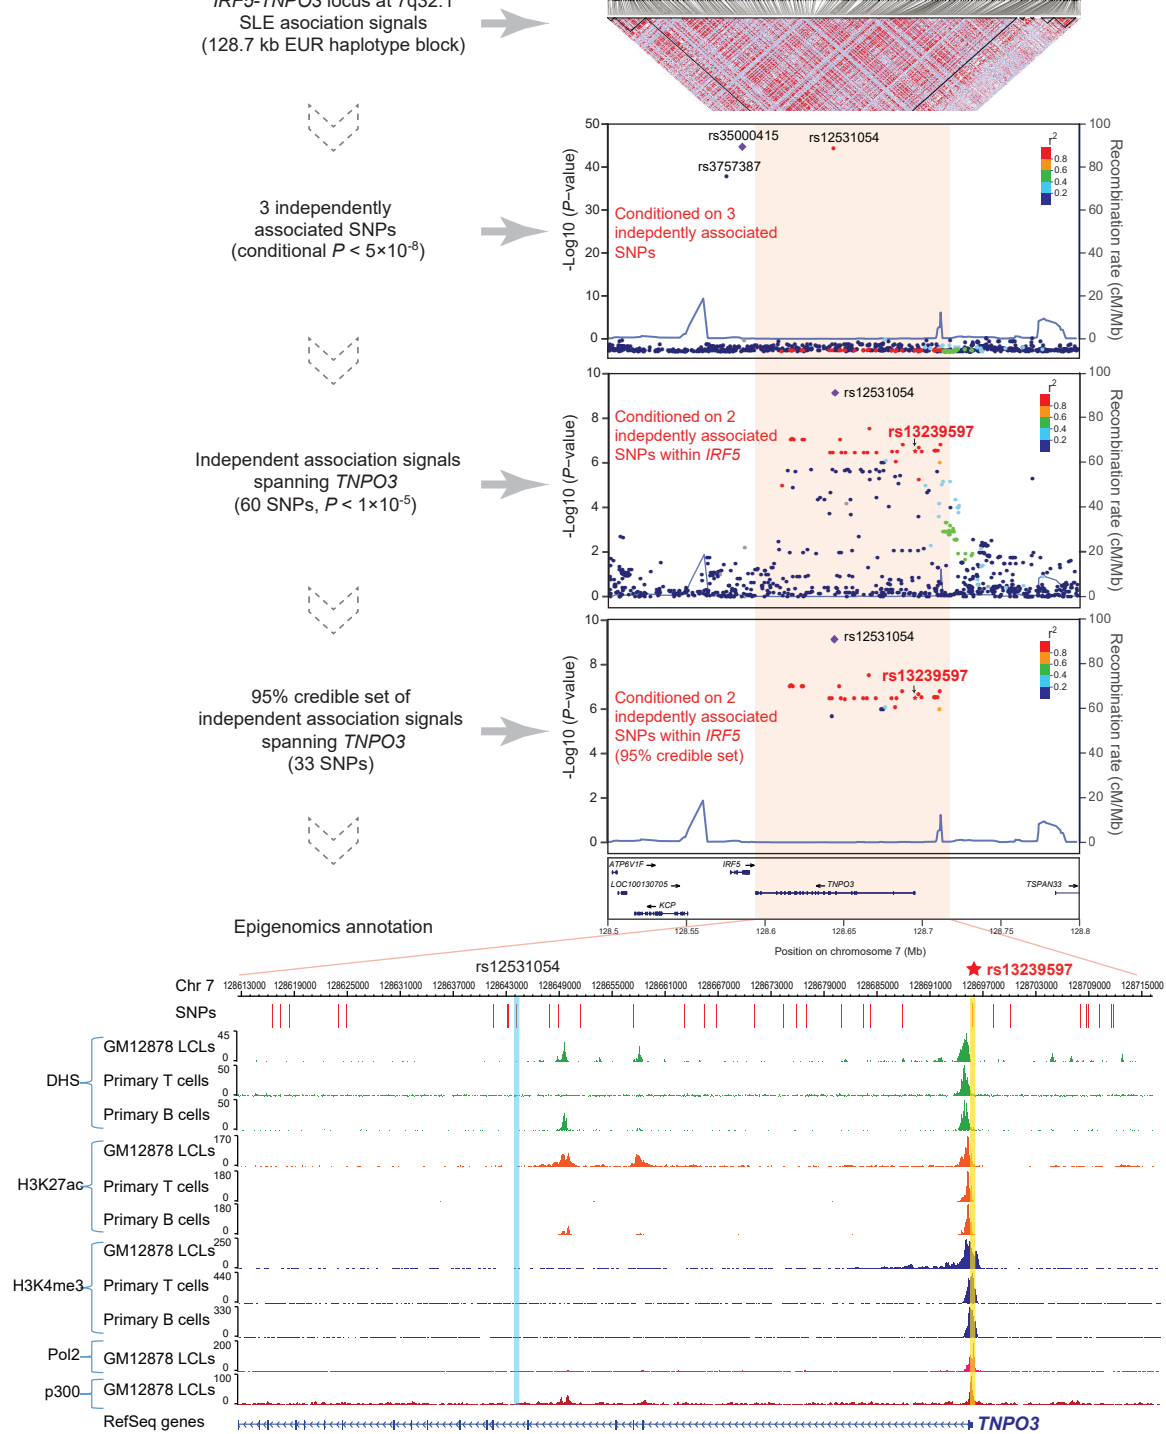

Figure 2

bioRxiv preprint doi: <https://doi.org/10.1101/533661>; this version posted January 29, 2019. The copyright holder for this preprint (which was not certified by peer review) is the author/funder. All rights reserved. No reuse allowed without permission.

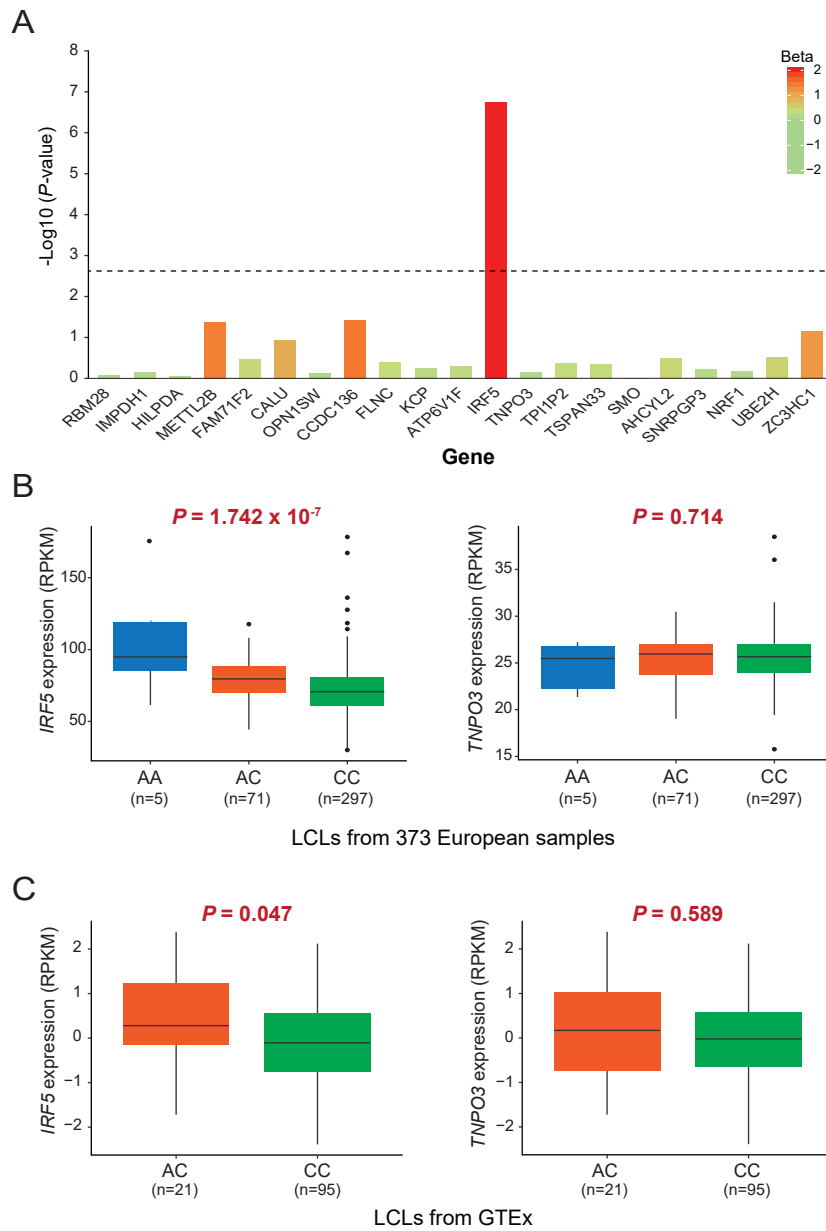



Figure 3

bioRxiv preprint doi: <https://doi.org/10.1101/533661>; this version posted January 29, 2019. The copyright holder for this preprint (which was not certified by peer review) is the author/funder. All rights reserved. No reuse allowed without permission.

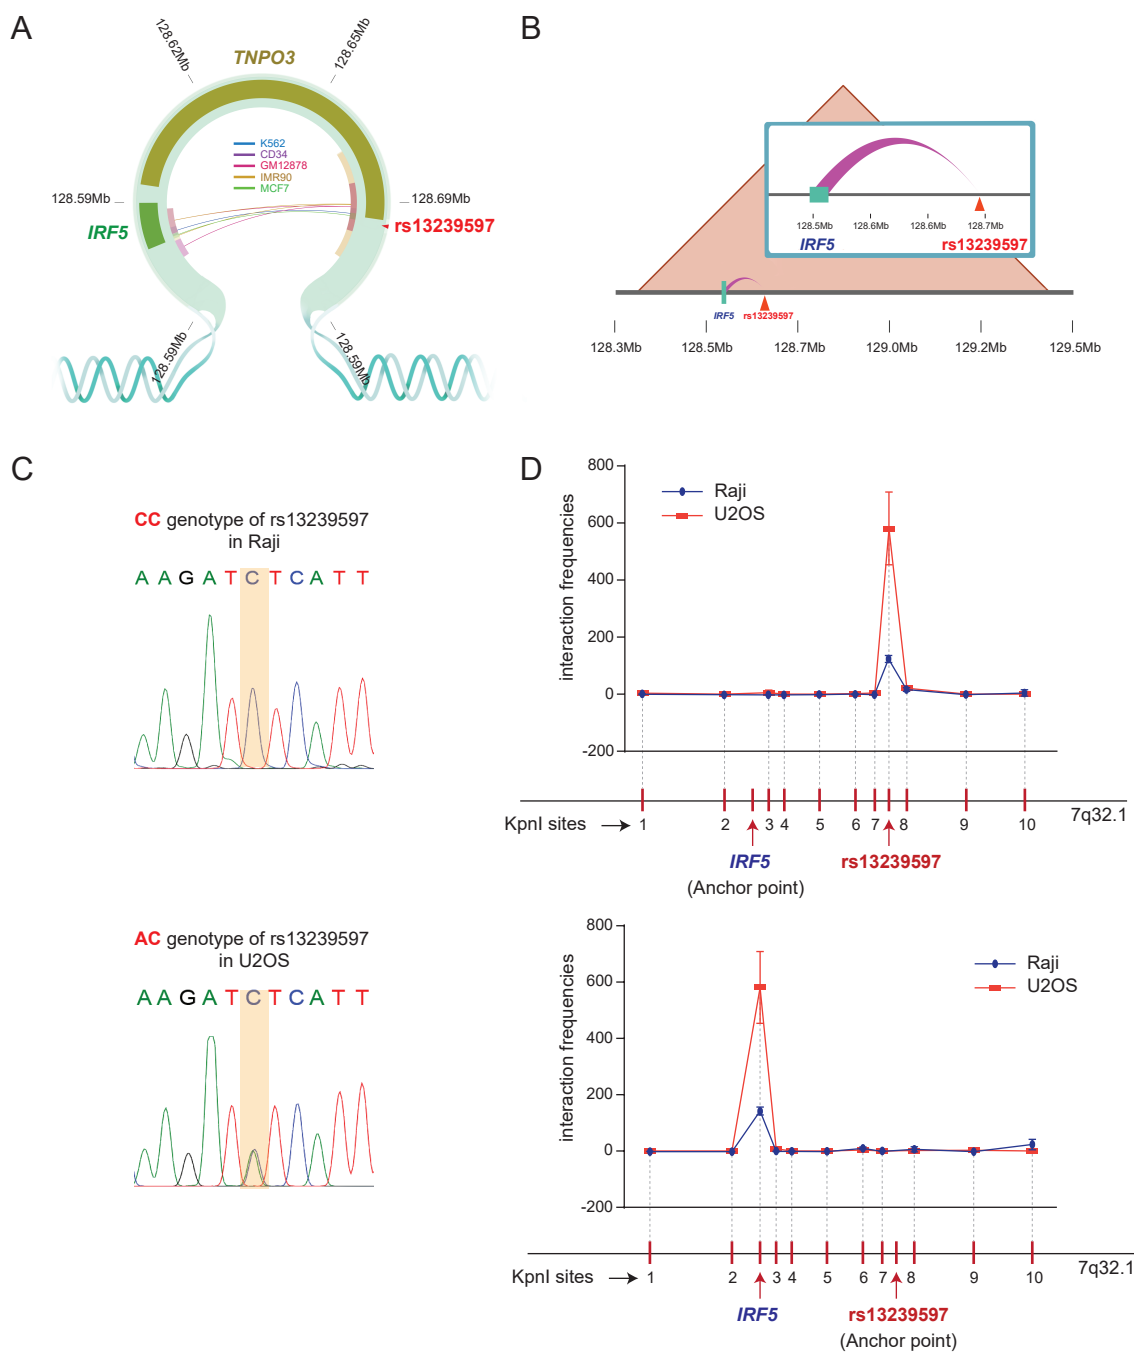

Figure 4

bioRxiv preprint doi: <https://doi.org/10.1101/533661>; this version posted January 29, 2019. The copyright holder for this preprint (which was not certified by peer review) is the author/funder. All rights reserved. No reuse allowed without permission.

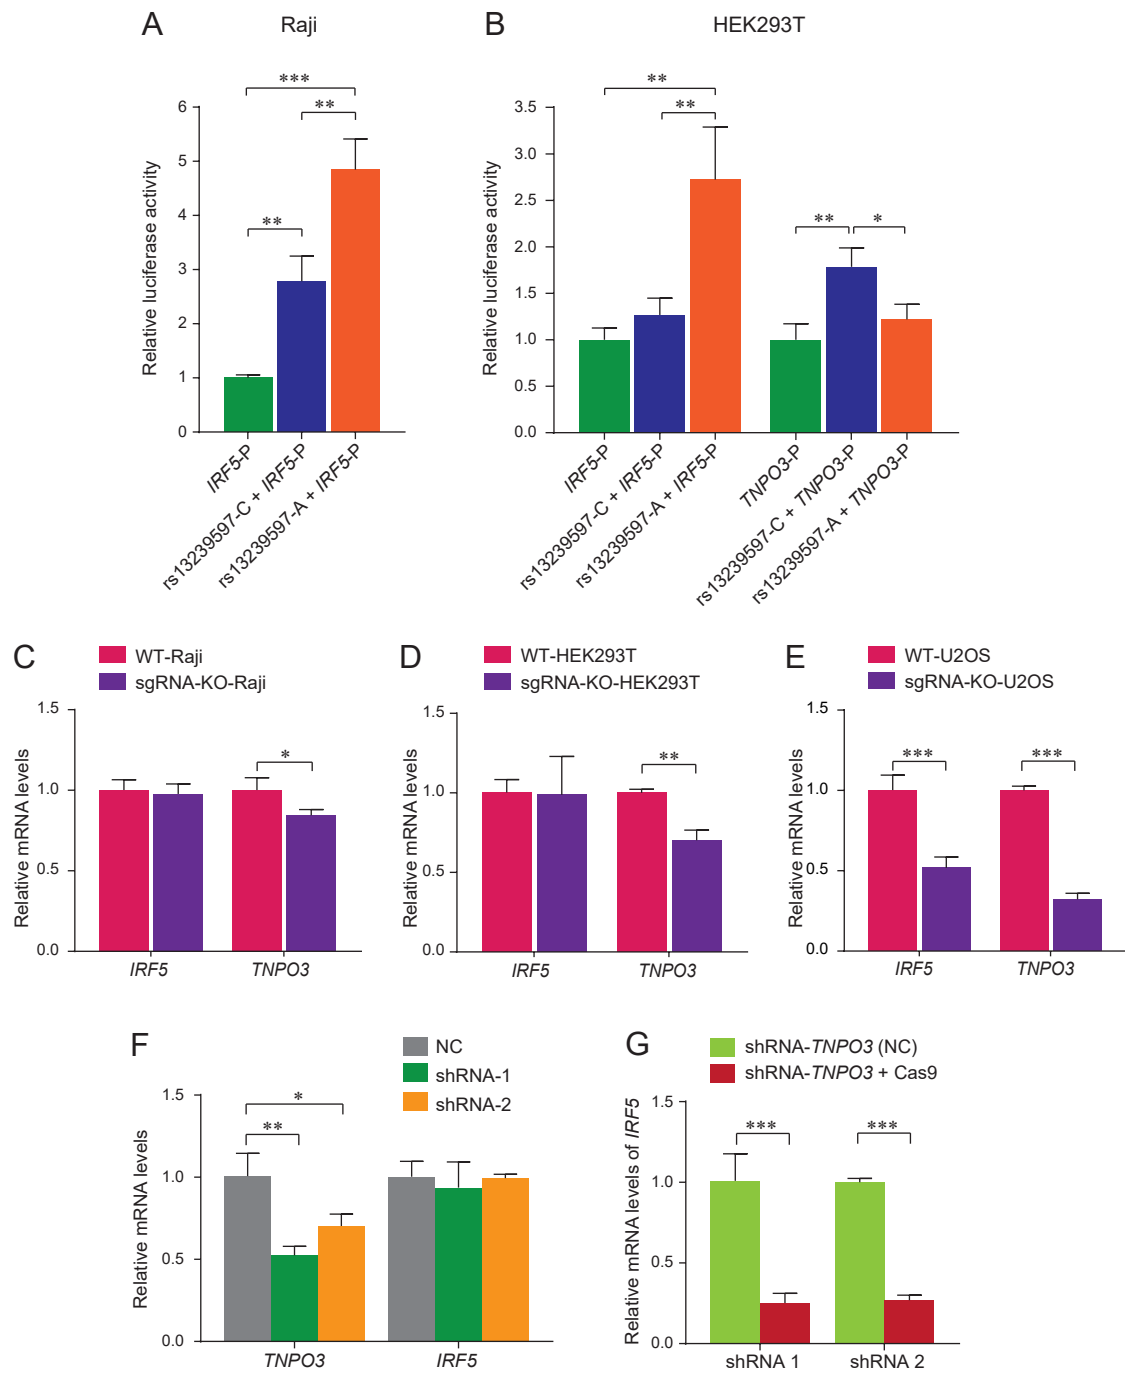

Figure 5

bioRxiv preprint doi: <https://doi.org/10.1101/533661>; this version posted January 29, 2019. The copyright holder for this preprint (which was not certified by peer review) is the author/funder. All rights reserved. No reuse allowed without permission.

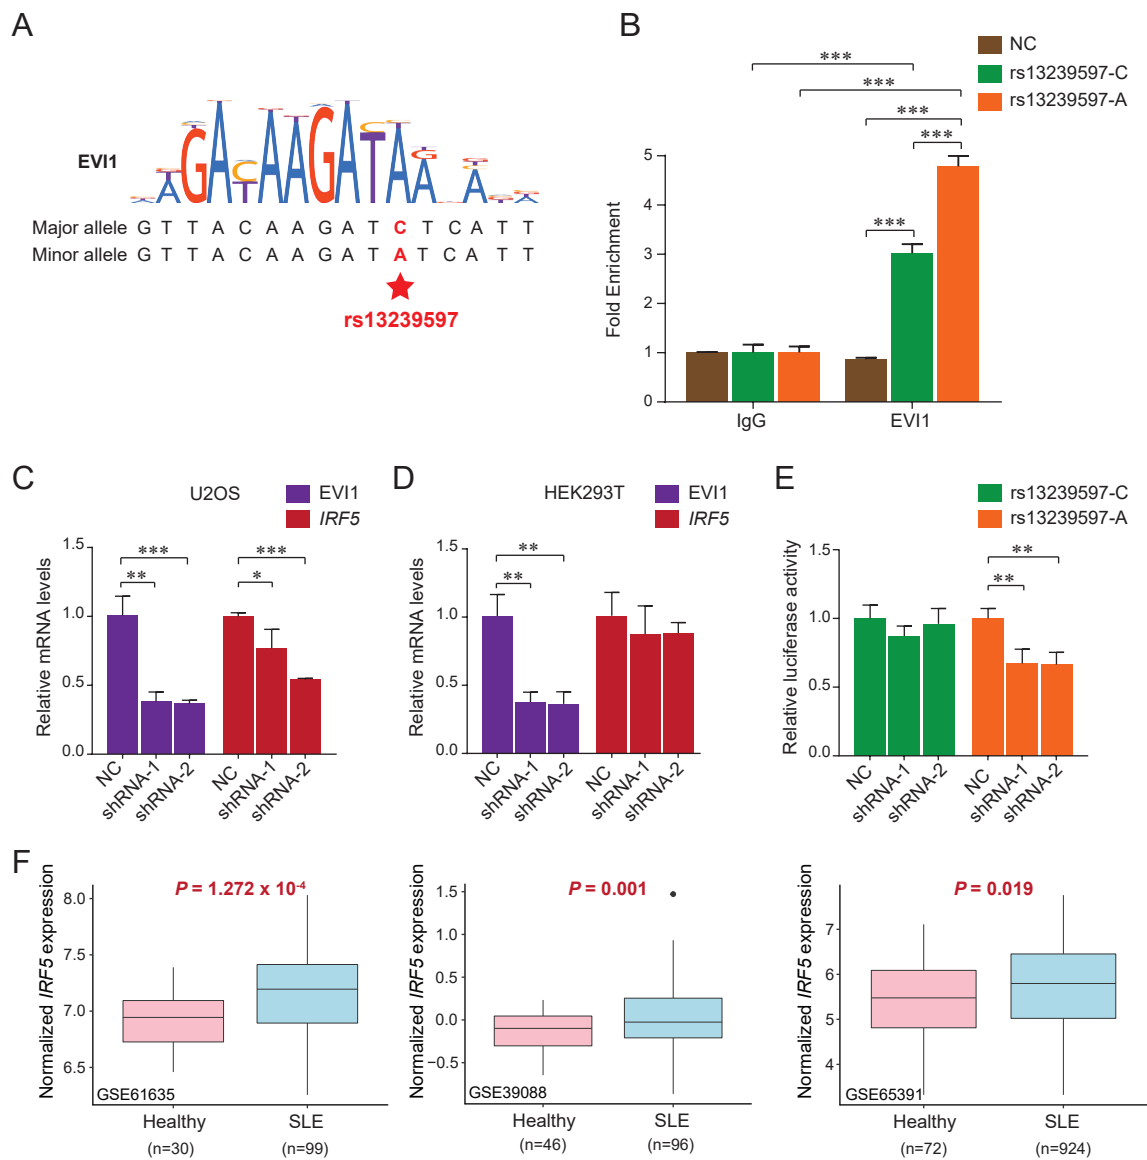

Figure 6

bioRxiv preprint doi: <https://doi.org/10.1101/533661>; this version posted January 29, 2019. The copyright holder for this preprint (which was not certified by peer review) is the author/funder. All rights reserved. No reuse allowed without permission.

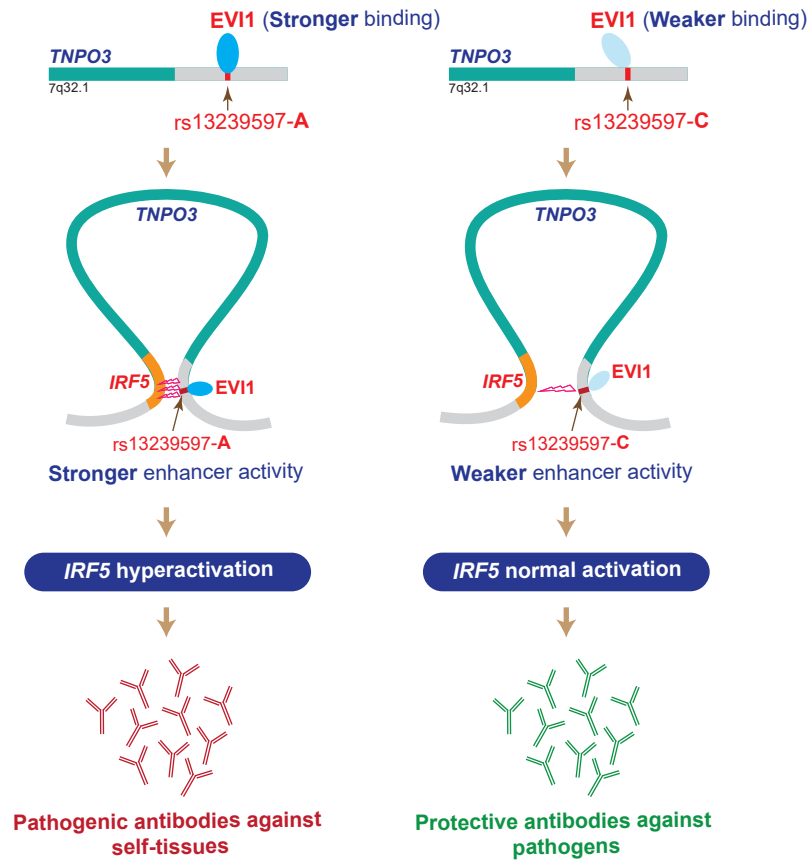

Source: https://www.biorxiv.org/content/10.1101/533661v1.full.pdf
